# Supplementary material for: Identification of Protein Biomarker Signatures for Acute Myeloid Leukemia (AML) Using Both Nontargeted and Targeted Approaches
Source: MDPI journal article supplement (doi:10.3390/proteomes9040042), 2021-10-30
Supplement: s1 [file s1]

# Supplementary

**Table S1.** Raw mass spec data.

| LFQ<br>intensity | LFQ<br>intensity | Up<br>Gr1 | Up<br>Gr2 | N:<br>ANOVA<br>p value | T: Fasta headers                                                                                                      |
|------------------|------------------|-----------|-----------|------------------------|-----------------------------------------------------------------------------------------------------------------------|
| average Gr1      | average Gr2      | (fold)    | (fold)    |                        |                                                                                                                       |
| 21644617.57      | 15204309.63      | 1.42      |           | 0.0014803<br>1         | >sp Q93009 UBP7_HUMAN Ubiquitin carboxyl-terminal hydrolase 7 OS=Homo sapiens GN=USP7 PE=1 SV=2                       |
| 12793561.74      | 25805905.08      |           | 2.02      | 0.0044430<br>6         | >sp Q92598 HS105_HUMAN Heat shock protein 105 kDa OS=Homo sapiens GN=HSPH1 PE=1 SV=1                                  |
| 30463495.72      | 35495869.5       |           | 1.17      | 0.0064831<br>6         | >sp Q16555 DPYL2_HUMAN Dihydropyrimidinase-related protein 2 OS=Homo sapiens GN=DPYSL2 PE=1 SV=1                      |
| 29461410.8       | 33291487.17      |           | 1.13      | 0.0073738<br>4         | >sp Q01130 SRSF2_HUMAN Serine/arginine-rich splicing factor 2 OS=Homo sapiens GN=SRSF2 PE=1 SV=4                      |
| 92827047.65      | 58709719.15      | 1.58      |           | 0.0103082              | >sp P35637 FUS_HUMAN RNA-binding protein FUS OS=Homo sapiens GN=FUS PE=1 SV=1                                         |
| 34175553.92      | 23598350.28      | 1.45      |           | 0.0119059              | >sp Q9Y3I0 RTCB_HUMAN tRNA-splicing ligase RtcB homolog OS=Homo sapiens GN=RTCB PE=1 SV=1                             |
| 40295741.1       | 32215519.14      | 1.25      |           | 0.0166749              | >sp Q99873 ANM1_HUMAN Protein arginine N-methyltransferase 1 OS=Homo sapiens GN=PRMT1 PE=1 SV=2                       |
| 21075047.97      | 17385027.38      | 1.21      |           | 0.0202006              | >sp P25786 PSA1_HUMAN Proteasome subunit alpha type-1 OS=Homo sapiens GN=PSMA1 PE=1 SV=1                              |
| 22797483.04      | 24323990.18      |           | 1.07      | 0.0203649              | >sp Q9BUJ2 HNRL1_HUMAN Heterogeneous nuclear ribonucleoprotein U-like protein 1 OS=Homo sapiens GN=HNRNPUL1 PE=1 SV=2 |
| 21809068.9       | 28647266.06      |           | 1.31      | 0.0218747              | >sp P51148 RAB5C_HUMAN Ras-related protein Rab-5C OS=Homo sapiens GN=RAB5C PE=1 SV=2                                  |
| 26584863.47      | 20979146.8       | 1.27      |           | 0.0302054              | >sp P26640 SYVC_HUMAN Valine--tRNA ligase OS=Homo sapiens GN=VAR5 PE=1 SV=4                                           |
| 484310003.2      | 602290316.1      |           | 1.24      | 0.0318372              | >sp P63104 1433Z_HUMAN 14-3-3 protein zeta/delta OS=Homo sapiens GN=YWHAZ PE=1 SV=1                                   |
| 145954935.4      | 761547718        |           | 5.22      | 0.0350197              | >sp P00915 CAH1_HUMAN Carbonic anhydrase 1 OS=Homo sapiens GN=CA1 PE=1 SV=2                                           |
| 60728863.16      | 26835473.85      | 2.26      |           | 0.0353199              | >sp Q13813 SPTN1_HUMAN Spectrin alpha chain, non-erythrocytic 1 OS=Homo sapiens GN=SPTAN1 PE=1 SV=3                   |
| 389883936        | 513314463        |           | 1.32      | 0.0428754              | >sp P00338 LDHA_HUMAN L-lactate dehydrogenase A chain OS=Homo sapiens GN=LDHA PE=1 SV=2                               |
| 964543265.5      | 1409272256       |           | 1.46      | 0.0446947              | >sp P21333 FLNA_HUMAN Filamin-A OS=Homo sapiens GN=FLNA PE=1 SV=4                                                     |
| 305858031.6      | 394608073.8      |           | 1.29      | 0.0460146              | >sp P08133 ANXA6_HUMAN Annexin A6 OS=Homo sapiens GN=ANXA6 PE=1 SV=3                                                  |
| 46788978.26      | 84935906.92      |           | 1.82      | 0.0483834              | >sp P11413 G6PD_HUMAN Glucose-6-phosphate 1-dehydrogenase OS=Homo sapiens GN=G6PD PE=1 SV=4                           |

**Table S2.** Raw mass spec data.

| LFQ<br>intensity<br>average Gr1 | LFQ<br>intensity<br>average Gr3 | Up<br>Gr1<br>(fold) | Up<br>Gr3<br>(fold) | N:<br>ANOVA<br>p value | T: Fasta headers                                                                                                  |
|---------------------------------|---------------------------------|---------------------|---------------------|------------------------|-------------------------------------------------------------------------------------------------------------------|
| 27989216.3                      | 115825588.8                     |                     | 4.14                | 0.0005619<br>4         | >sp P05455 LA_HUMAN Lupus La protein OS=Homo sapiens<br>GN=SSB PE=1 SV=2                                          |
| 17620651.02                     | 38979456.62                     |                     | 2.21                | 0.0006100<br>23        | >sp Q96FW1 OTUB1_HUMAN Ubiquitin thioesterase OTUB1<br>OS=Homo sapiens GN=OTUB1 PE=1 SV=2                         |
| 23432341.97                     | 123795295.7                     |                     | 5.28                | 0.0009931<br>05        | >sp Q96KP4 CNDP2_HUMAN Cytosolic non-specific<br>dipeptidase OS=Homo sapiens GN=CNDP2 PE=1 SV=2                   |
| 85810447.36                     | 217145570                       |                     | 2.53                | 0.0012291<br>1         | >sp P62826 RAN_HUMAN GTP-binding nuclear protein Ran<br>OS=Homo sapiens GN=RAN PE=1 SV=3                          |
| 99541315.27                     | 408714160                       |                     | 4.11                | 0.0018760<br>3         | >sp P07910 HNRPC_HUMAN Heterogeneous nuclear<br>ribonucleoproteins C1/C2 OS=Homo sapiens GN=HNRNPC PE=1<br>SV=4   |
| 25836497.1                      | 109232231.9                     |                     | 4.23                | 0.0027993<br>8         | >sp O60506 HNRPQ_HUMAN Heterogeneous nuclear<br>ribonucleoprotein Q OS=Homo sapiens GN=SYNCRIP PE=1 SV=2          |
| 50926596.61                     | 336618814.5                     |                     | 6.61                | 0.0034246<br>8         | >sp P10809 CH60_HUMAN 60 kDa heat shock protein,<br>mitochondrial OS=Homo sapiens GN=HSPD1 PE=1 SV=2              |
| 88870562.3                      | 260133710                       |                     | 2.93                | 0.0041006<br>4         | >sp P30041 PRDX6_HUMAN Peroxiredoxin-6 OS=Homo sapiens<br>GN=PRDX6 PE=1 SV=3                                      |
| 257475993.4                     | 955372000                       |                     | 3.71                | 0.0049152<br>9         | >sp P68363 TBA1B_HUMAN Tubulin alpha-1B chain OS=Homo<br>sapiens GN=TUBA1B PE=1 SV=1                              |
| 157439069                       | 351895940                       |                     | 2.24                | 0.0057087<br>4         | >sp P55072 TERA_HUMAN Transitional endoplasmic reticulum<br>ATPase OS=Homo sapiens GN=VCP PE=1 SV=4               |
| 253272631.7                     | 550196560                       |                     | 2.17                | 0.0060856<br>9         | >sp Q01105 SET_HUMAN Protein SET OS=Homo sapiens<br>GN=SET PE=1 SV=3                                              |
| 331274406.3                     | 940537350                       |                     | 2.84                | 0.0064735<br>3         | >sp P22626 ROA2_HUMAN Heterogeneous nuclear<br>ribonucleoproteins A2/B1 OS=Homo sapiens GN=HNRNPA2B1<br>PE=1 SV=2 |
| 134035315.9                     | 94474334.01                     | 1.42                |                     | 0.0065047<br>2         | >sp P47756 CAPZB_HUMAN F-actin-capping protein subunit<br>beta OS=Homo sapiens GN=CAPZB PE=1 SV=4                 |
| 37789633.48                     | 75617200.34                     |                     | 2.00                | 0.0066793<br>9         | >sp Q9P258 RCC2_HUMAN Protein RCC2 OS=Homo sapiens<br>GN=RCC2 PE=1 SV=2                                           |
| 31425883.71                     | 132157901.1                     |                     | 4.21                | 0.0067039<br>9         | >sp P40939 ECHA_HUMAN Trifunctional enzyme subunit<br>alpha, mitochondrial OS=Homo sapiens GN=HADHA PE=1 SV=2     |
| 138543856.2                     | 109383130.3                     | 1.27                |                     | 0.0070447<br>4         | >sp P59998 ARPC4_HUMAN Actin-related protein 2/3 complex<br>subunit 4 OS=Homo sapiens GN=ARPC4 PE=1 SV=3          |
| 69673823.57                     | 35227649.22                     | 1.98                |                     | 0.0073121<br>7         | >sp P08575 PTPRC_HUMAN Receptor-type tyrosine-protein<br>phosphatase C OS=Homo sapiens GN=PTPRC PE=1 SV=2         |
| 78423596.05                     | 194113230                       |                     | 2.48                | 0.0081358<br>1         | >sp Q15233 NONO_HUMAN Non-POU domain-containing<br>octamer-binding protein OS=Homo sapiens GN=NONO PE=1<br>SV=4   |
| 63043156.94                     | 182621557.2                     |                     | 2.90                | 0.0090750<br>7         | >sp P10599 THIO_HUMAN Thioredoxin OS=Homo sapiens<br>GN=TXN PE=1 SV=3                                             |
| 68000208.82                     | 134688866.2                     |                     | 1.98                | 0.0111121              | >sp Q12906 ILF3_HUMAN Interleukin enhancer-binding factor 3<br>OS=Homo sapiens GN=ILF3 PE=1 SV=3                  |
| 484224749.8                     | 1677393080                      |                     | 3.46                | 0.0111418              | >sp P08670 VIME_HUMAN Vimentin OS=Homo sapiens<br>GN=VIM PE=1 SV=4                                                |
| 309272399.7                     | 656301000                       |                     | 2.12                | 0.0123849              | >sp P37837 TALDO_HUMAN Transaldolase OS=Homo sapiens<br>GN=TALDO1 PE=1 SV=2                                       |

|             |             |      |           |                                                                                                                           |
|-------------|-------------|------|-----------|---------------------------------------------------------------------------------------------------------------------------|
| 291835142.3 | 580654160   | 1.99 | 0.012542  | >sp P00338 LDHA_HUMAN L-lactate dehydrogenase A chain<br>OS=Homo sapiens GN=LDHA PE=1 SV=2                                |
| 29142878.66 | 67674845.62 | 2.32 | 0.01334   | >sp Q99832 TCPH_HUMAN T-complex protein 1 subunit eta<br>OS=Homo sapiens GN=CCT7 PE=1 SV=2                                |
| 304261545.1 | 860462700   | 2.83 | 0.0140139 | >sp P19338 NUCL_HUMAN Nucleolin OS=Homo sapiens<br>GN=NCL PE=1 SV=3                                                       |
| 60097496.09 | 35953156.78 | 1.67 | 0.0156332 | >sp Q9UJ70 NAGK_HUMAN N-acetyl-D-glucosamine kinase<br>OS=Homo sapiens GN=NAGK PE=1 SV=4                                  |
| 46544255.95 | 189410327.9 | 4.07 | 0.0161399 | >sp Q08211 DHX9_HUMAN ATP-dependent RNA helicase A<br>OS=Homo sapiens GN=DHX9 PE=1 SV=4                                   |
| 27967759.03 | 29115989.68 | 1.04 | 0.0162337 | >sp Q13162 PRDX4_HUMAN Peroxiredoxin-4 OS=Homo<br>sapiens GN=PRDX4 PE=1 SV=1                                              |
| 56392455.54 | 142312109.3 | 2.52 | 0.0170011 | >sp P53999 TCP4_HUMAN Activated RNA polymerase II<br>transcriptional coactivator p15 OS=Homo sapiens GN=SUB1 PE=1<br>SV=3 |
| 418131328.3 | 802572960   | 1.92 | 0.0176241 | >sp P07900 HS90A_HUMAN Heat shock protein HSP 90-alpha<br>OS=Homo sapiens GN=HSP90AA1 PE=1 SV=5                           |
| 203961425.8 | 519626660   | 2.55 | 0.0176808 | >sp P09651 ROA1_HUMAN Heterogeneous nuclear<br>ribonucleoprotein A1 OS=Homo sapiens GN=HNRNPA1 PE=1<br>SV=5               |
| 174119675.7 | 454287660   | 2.61 | 0.0193991 | >sp P07195 LDHB_HUMAN L-lactate dehydrogenase B chain<br>OS=Homo sapiens GN=LDHB PE=1 SV=2                                |
| 207319039   | 499202770   | 2.41 | 0.0195896 | >sp Q5VTE0 EF1A3_HUMAN Putative elongation factor 1-<br>alpha-like 3 OS=Homo sapiens GN=EEF1A1P5 PE=5 SV=1                |
| 18236703.29 | 32924694    | 1.81 | 0.0197373 | >sp P39748 FEN1_HUMAN Flap endonuclease 1 OS=Homo<br>sapiens GN=FEN1 PE=1 SV=1                                            |
| 199123016   | 383244220   | 1.92 | 0.021345  | >sp P13639 EF2_HUMAN Elongation factor 2 OS=Homo sapiens<br>GN=EEF2 PE=1 SV=4                                             |
| 202569325.4 | 527571910   | 2.60 | 0.0244764 | >sp P06748 NPM_HUMAN Nucleophosmin OS=Homo sapiens<br>GN=NPM1 PE=1 SV=2                                                   |
| 40464288.88 | 98374767.66 | 2.43 | 0.0245519 | >sp P50502 F10A1_HUMAN Hsc70-interacting protein<br>OS=Homo sapiens GN=ST13 PE=1 SV=2                                     |
| 396624547.9 | 631679750   | 1.59 | 0.0264211 | >sp P63104 1433Z_HUMAN 14-3-3 protein zeta/delta OS=Homo<br>sapiens GN=YWHAZ PE=1 SV=1                                    |
| 14899971.19 | 103620853.3 | 6.95 | 0.0267052 | >sp Q13263 TIF1B_HUMAN Transcription intermediary factor 1-<br>beta OS=Homo sapiens GN=TRIM28 PE=1 SV=5                   |
| 38781760.07 | 81117161.07 | 2.09 | 0.0284753 | >sp P10768 ESTD_HUMAN S-formylglutathione hydrolase<br>OS=Homo sapiens GN=ESD PE=1 SV=2                                   |
| 118182692.6 | 280003270   | 2.37 | 0.0290622 | >sp P31943 HNRH1_HUMAN Heterogeneous nuclear<br>ribonucleoprotein H OS=Homo sapiens GN=HNRNPH1 PE=1<br>SV=4               |
| 15765405.36 | 33229344.87 | 2.11 | 0.0296814 | >sp Q9Y383 LC7L2_HUMAN Putative RNA-binding protein<br>Luc7-like 2 OS=Homo sapiens GN=LUC7L2 PE=1 SV=2                    |
| 28420243.64 | 49592052.29 | 1.74 | 0.0300935 | >sp P40227 TCPZ_HUMAN T-complex protein 1 subunit zeta<br>OS=Homo sapiens GN=CCT6A PE=1 SV=3                              |
| 121973530.6 | 274984790   | 2.25 | 0.030321  | >sp Q14697 GANAB_HUMAN Neutral alpha-glucosidase AB<br>OS=Homo sapiens GN=GANAB PE=1 SV=3                                 |
| 571008404.4 | 439810950   | 1.30 | 0.0312292 | >sp P18669 PGAM1_HUMAN Phosphoglycerate mutase 1<br>OS=Homo sapiens GN=PGAM1 PE=1 SV=2                                    |
| 4580514156  | 7759186800  | 1.69 | 0.0313467 | >sp P60709 ACTB_HUMAN Actin, cytoplasmic 1 OS=Homo<br>sapiens GN=ACTB PE=1 SV=1                                           |

|             |             |      |           |                                                                                                             |
|-------------|-------------|------|-----------|-------------------------------------------------------------------------------------------------------------|
| 69698139.56 | 200688980   | 2.88 | 0.0318483 | >sp P09874 PARP1_HUMAN Poly [ADP-ribose] polymerase 1<br>OS=Homo sapiens GN=PARP1 PE=1 SV=4                 |
| 13987403.03 | 29864170.01 | 2.14 | 0.0321374 | >sp Q9Y230 RUVB2_HUMAN RuvB-like 2 OS=Homo sapiens<br>GN=RUVBL2 PE=1 SV=3                                   |
| 66371127.09 | 55672389.84 | 1.19 | 0.0336147 | >sp Q9UFN0 NPS3A_HUMAN Protein NipSnap homolog 3A<br>OS=Homo sapiens GN=NIPSNAP3A PE=1 SV=2                 |
| 60400945.83 | 130641368.9 | 2.16 | 0.0341093 | >sp P22392 NDKB_HUMAN Nucleoside diphosphate kinase B<br>OS=Homo sapiens GN=NME2 PE=1 SV=1                  |
| 22503407.44 | 35988929.57 | 1.60 | 0.034698  | >sp P61586 RHOA_HUMAN Transforming protein RhoA<br>OS=Homo sapiens GN=RHOA PE=1 SV=1                        |
| 145306473.6 | 283177600   | 1.95 | 0.0349487 | >sp P23246 SFPQ_HUMAN Splicing factor, proline- and<br>glutamine-rich OS=Homo sapiens GN=SFPQ PE=1 SV=2     |
| 11350737.7  | 26228066.13 | 2.31 | 0.0351966 | >sp P38919 IF4A3_HUMAN Eukaryotic initiation factor 4A-III<br>OS=Homo sapiens GN=EIF4A3 PE=1 SV=4           |
| 84881721.98 | 206272690   | 2.43 | 0.0371499 | >sp Q00839 HNRPU_HUMAN Heterogeneous nuclear<br>ribonucleoprotein U OS=Homo sapiens GN=HNRNPU PE=1 SV=6     |
| 37952247.32 | 99179532.29 | 2.61 | 0.0390372 | >sp P09622 DLDH_HUMAN Dihydrolipoyl dehydrogenase,<br>mitochondrial OS=Homo sapiens GN=DLD PE=1 SV=2        |
| 26305156.96 | 94276004.66 | 3.58 | 0.0411292 | >sp P08865 RSSA_HUMAN 40S ribosomal protein SA OS=Homo<br>sapiens GN=RPSA PE=1 SV=4                         |
| 123585653   | 293751070   | 2.38 | 0.0416041 | >sp P51991 ROA3_HUMAN Heterogeneous nuclear<br>ribonucleoprotein A3 OS=Homo sapiens GN=HNRNPA3 PE=1<br>SV=2 |
| 352811544.8 | 978950640   | 2.77 | 0.0416941 | >sp P04406 G3P_HUMAN Glyceraldehyde-3-phosphate<br>dehydrogenase OS=Homo sapiens GN=GAPDH PE=1 SV=3         |
| 29805165.9  | 133543109.5 | 4.48 | 0.0421742 | >sp P23396 RS3_HUMAN 40S ribosomal protein S3 OS=Homo<br>sapiens GN=RPS3 PE=1 SV=2                          |
| 21657312.97 | 21958325.57 | 1.01 | 0.0442945 | >sp Q16658 FSCN1_HUMAN Fascin OS=Homo sapiens<br>GN=FSCN1 PE=1 SV=3                                         |
| 667307172.5 | 547200440   | 1.22 | 0.0458245 | >sp P62987 RL40_HUMAN Ubiquitin-60S ribosomal protein L40<br>OS=Homo sapiens GN=UBA52 PE=1 SV=2             |
| 249618873   | 421229950   | 1.69 | 0.0490485 | >sp P30101 PDIA3_HUMAN Protein disulfide-isomerase A3<br>OS=Homo sapiens GN=PDIA3 PE=1 SV=4                 |
| 546660567   | 952696560   | 1.74 | 0.0493623 | >sp P11142 HSP7C_HUMAN Heat shock cognate 71 kDa protein<br>OS=Homo sapiens GN=HSPA8 PE=1 SV=1              |
| 61202503.14 | 52445205.07 | 1.17 | 0.0496246 | >sp Q15631 TSN_HUMAN Translin OS=Homo sapiens GN=TSN<br>PE=1 SV=1                                           |

**Table S3.** Raw mass spec data.

| LFQ<br>intensity | LFQ<br>intensity | Up<br>Gr2 | Up<br>Gr3 | N:<br>ANOVA<br>p value | T: Fasta headers                                                                                                                        |
|------------------|------------------|-----------|-----------|------------------------|-----------------------------------------------------------------------------------------------------------------------------------------|
| average Gr2      | average Gr3      | (fold)    | (fold)    |                        |                                                                                                                                         |
| 425260745.6      | 69158701.21      | 6.15      |           | 0.0007345<br>36        | >sp P06576 ATPB_HUMAN ATP synthase subunit beta,<br>mitochondrial OS=Homo sapiens GN=ATP5B PE=1 SV=3                                    |
| 89924415.07      | 13442835.74      | 6.69      |           | 0.0010141              | >sp Q9Y2Q3 GSTK1_HUMAN Glutathione S-transferase kappa 1<br>OS=Homo sapiens GN=GSTK1 PE=1 SV=3                                          |
| 1502380655       | 231590605.2      | 6.49      |           | 0.0036780<br>6         | >sp Q09666 AHNK_HUMAN Neuroblast differentiation-associated<br>protein AHNAK OS=Homo sapiens GN=AHNAK PE=1 SV=2                         |
| 38964933.09      | 28026826.18      | 1.39      |           | 0.0043350<br>1         | >sp O43776 SYNC_HUMAN Asparagine--tRNA ligase, cytoplasmic<br>OS=Homo sapiens GN=NARS PE=1 SV=1                                         |
| 69718905.22      | 31406023.08      | 2.22      |           | 0.0049443<br>6         | >sp P17987 TCPA_HUMAN T-complex protein 1 subunit alpha<br>OS=Homo sapiens GN=TCP1 PE=1 SV=1                                            |
| 96833920.83      | 72436996.59      | 1.34      |           | 0.0073992<br>1         | >sp P61981 1433G_HUMAN 14-3-3 protein gamma OS=Homo<br>sapiens GN=YWHAG PE=1 SV=2                                                       |
| 309078055.3      | 105720027.6      | 2.92      |           | 0.0097287<br>5         | >sp P10809 CH60_HUMAN 60 kDa heat shock protein,<br>mitochondrial OS=Homo sapiens GN=HSPD1 PE=1 SV=2                                    |
| 74917286.33      | 32768753.47      | 2.29      |           | 0.0101548              | >sp P38606 VATA_HUMAN V-type proton ATPase catalytic<br>subunit A OS=Homo sapiens GN=ATP6V1A PE=1 SV=2                                  |
| 179148424.7      | 14955863.04      | 11.98     |           | 0.010329               | >sp P78527 PRKDC_HUMAN DNA-dependent protein kinase<br>catalytic subunit OS=Homo sapiens GN=PRKDC PE=1 SV=3                             |
| 559741885.2      | 323014383.3      | 1.73      |           | 0.010542               | >sp P37802 TAGL2_HUMAN Transgelin-2 OS=Homo sapiens<br>GN=TAGLN2 PE=1 SV=3                                                              |
| 43734471.19      | 23355019.24      | 1.87      |           | 0.011983               | >sp P04843 RPN1_HUMAN Dolichyl-diphosphooligosaccharide--<br>protein glycosyltransferase subunit 1 OS=Homo sapiens GN=RPN1<br>PE=1 SV=1 |
| 79722812.19      | 47491133.22      | 1.68      |           | 0.0125269              | >sp Q99832 TCPH_HUMAN T-complex protein 1 subunit eta<br>OS=Homo sapiens GN=CCT7 PE=1 SV=2                                              |
| 54397971.67      | 73815348.1       |           | 1.36      | 0.0132291              | >sp Q13404 UB2V1_HUMAN Ubiquitin-conjugating enzyme E2<br>variant 1 OS=Homo sapiens GN=UBE2V1 PE=1 SV=2                                 |
| 55017867.32      | 58698489.43      |           | 1.07      | 0.0157427              | >sp Q9UQ80 PA2G4_HUMAN Proliferation-associated protein 2G4<br>OS=Homo sapiens GN=PA2G4 PE=1 SV=3                                       |
| 733244859.5      | 503096066.7      | 1.46      |           | 0.0158424              | >sp P22626 ROA2_HUMAN Heterogeneous nuclear<br>ribonucleoproteins A2/B1 OS=Homo sapiens GN=HNRNPA2B1<br>PE=1 SV=2                       |
| 301342173.3      | 50730431.26      | 5.94      |           | 0.0182628              | >sp P25705 ATPA_HUMAN ATP synthase subunit alpha,<br>mitochondrial OS=Homo sapiens GN=ATP5A1 PE=1 SV=1                                  |
| 318876569.2      | 204490033.3      | 1.56      |           | 0.0196012              | >sp P22314 UBA1_HUMAN Ubiquitin-like modifier-activating<br>enzyme 1 OS=Homo sapiens GN=UBA1 PE=1 SV=3                                  |
| 57522666.81      | 30003483.4       | 1.92      |           | 0.0200307              | >sp Q96AE4 FUBP1_HUMAN Far upstream element-binding<br>protein 1 OS=Homo sapiens GN=FUBP1 PE=1 SV=3                                     |
| 78851011.28      | 48029547.93      | 1.64      |           | 0.0202385              | >sp P49368 TCPG_HUMAN T-complex protein 1 subunit gamma<br>OS=Homo sapiens GN=CCT3 PE=1 SV=4                                            |
| 536682623.2      | 122191461.1      | 4.39      |           | 0.0214392              | >sp P68371 TBB4B_HUMAN Tubulin beta-4B chain OS=Homo<br>sapiens GN=TUBB4B PE=1 SV=1                                                     |
| 72889167.24      | 25702269.69      | 2.84      |           | 0.0219194              | >sp Q92945 FUBP2_HUMAN Far upstream element-binding<br>protein 2 OS=Homo sapiens GN=KHSRP PE=1 SV=4                                     |
| 162800643.9      | 360397795.7      |           | 2.21      | 0.0229496              | >sp P00491 PNPH_HUMAN Purine nucleoside phosphorylase<br>OS=Homo sapiens GN=PNP PE=1 SV=2                                               |

|             |             |      |           |                                                                                                         |
|-------------|-------------|------|-----------|---------------------------------------------------------------------------------------------------------|
| 107513842.4 | 205286883.3 | 1.91 | 0.0252643 | >sp P78417 GSTO1_HUMAN Glutathione S-transferase omega-1<br>OS=Homo sapiens GN=GSTO1 PE=1 SV=2          |
| 132113983.5 | 89957562.44 | 1.47 | 0.0262714 | >sp P07384 CAN1_HUMAN Calpain-1 catalytic subunit OS=Homo<br>sapiens GN=CAPN1 PE=1 SV=1                 |
| 15085839033 | 71638488833 | 4.75 | 0.0286061 | >sp P68871 HBB_HUMAN Hemoglobin subunit beta OS=Homo<br>sapiens GN=HBB PE=1 SV=2                        |
| 25641666.64 | 13828333.96 | 1.85 | 0.0287331 | >sp Q07812 BAX_HUMAN Apoptosis regulator BAX OS=Homo<br>sapiens GN=BAX PE=1 SV=1                        |
| 376534058.5 | 276392016.7 | 1.36 | 0.0300861 | >sp P13639 EF2_HUMAN Elongation factor 2 OS=Homo sapiens<br>GN=EEF2 PE=1 SV=4                           |
| 52214809.2  | 15768759.17 | 3.31 | 0.0309194 | >sp Q92499 DDX1_HUMAN ATP-dependent RNA helicase DDX1<br>OS=Homo sapiens GN=DDX1 PE=1 SV=2              |
| 171913243   | 95965872.09 | 1.79 | 0.0312378 | >sp Q86UX7 URP2_HUMAN Fermitin family homolog 3 OS=Homo<br>sapiens GN=FERMT3 PE=1 SV=1                  |
| 8531695368  | 45842013500 | 5.37 | 0.0315205 | >sp P69905 HBA_HUMAN Hemoglobin subunit alpha OS=Homo<br>sapiens GN=HBA1 PE=1 SV=2                      |
| 63409668.94 | 86973938.02 | 1.37 | 0.031608  | >sp P10768 ESTD_HUMAN S-formylglutathione hydrolase<br>OS=Homo sapiens GN=ESD PE=1 SV=2                 |
| 401658839.4 | 3288369300  | 8.19 | 0.0343655 | >sp P02042 HBD_HUMAN Hemoglobin subunit delta OS=Homo<br>sapiens GN=HBD PE=1 SV=2                       |
| 34033177.34 | 17923879.29 | 1.90 | 0.0383736 | >sp P61163 ACTZ_HUMAN Alpha-centractin OS=Homo sapiens<br>GN=ACTR1A PE=1 SV=1                           |
| 118057641   | 72219579.68 | 1.63 | 0.0386622 | >sp P78371 TCPB_HUMAN T-complex protein 1 subunit beta<br>OS=Homo sapiens GN=CCT2 PE=1 SV=4             |
| 55577320.87 | 68736095.37 | 1.24 | 0.0399822 | >sp Q13185 CBX3_HUMAN Chromobox protein homolog 3<br>OS=Homo sapiens GN=CBX3 PE=1 SV=4                  |
| 82746746.81 | 29827692.27 | 2.77 | 0.0433539 | >sp Q13263 TIF1B_HUMAN Transcription intermediary factor 1-<br>beta OS=Homo sapiens GN=TRIM28 PE=1 SV=5 |
| 33693163.91 | 38373060.48 | 1.14 | 0.0449425 | >sp P36871 PGM1_HUMAN Phosphoglucomutase-1 OS=Homo<br>sapiens GN=PGM1 PE=1 SV=3                         |
| 179180685.8 | 60889931.64 | 2.94 | 0.0454005 | >sp P60842 IF4A1_HUMAN Eukaryotic initiation factor 4A-I<br>OS=Homo sapiens GN=EIF4A1 PE=1 SV=1         |
| 50933159.54 | 14614229.35 | 3.49 | 0.0469324 | >sp P04632 CPNS1_HUMAN Calpain small subunit 1 OS=Homo<br>sapiens GN=CAPNS1 PE=1 SV=1                   |
| 62647568.81 | 38141045.34 | 1.64 | 0.0476984 | >sp P48643 TCPE_HUMAN T-complex protein 1 subunit epsilon<br>OS=Homo sapiens GN=CCT5 PE=1 SV=1          |

**Table S4.** Raw Luminex Data.

| <b><u>SDF-1<math>\alpha</math>1<math>\beta</math></u></b> |          |          |          |
|-----------------------------------------------------------|----------|----------|----------|
| Labels                                                    | Group 1  | Group 2  | Group 3  |
| Min                                                       | 590.9366 | 1378.852 | 590.9366 |
| Q1                                                        | 1280.363 | 4136.556 | 4530.514 |
| Median                                                    | 2363.746 | 10045.92 | 9258.006 |
| Q3                                                        | 6007.855 | 16743.2  | 13985.5  |
| Max                                                       | 11621.75 | 43138.37 | 29743.81 |
| IQR                                                       | 4727.492 | 12606.65 | 9454.985 |
| <b><u>IL-1<math>\alpha</math></u></b>                     |          |          |          |
| Labels                                                    | Group 1  | Group 2  | Group 3  |
| Min                                                       | 46.48854 | 29.7048  | 29.7048  |
| Q1                                                        | 72.89928 | 52.07111 | 50.67546 |
| Median                                                    | 85.98344 | 56.86243 | 52.07111 |
| Q3                                                        | 99.33722 | 68.5379  | 62.97241 |
| Max                                                       | 118.4796 | 74.97141 | 172.9529 |
| IQR                                                       | 26.43793 | 16.46679 | 12.29695 |
| <b><u>IL-17A</u></b>                                      |          |          |          |
| Labels                                                    | Group 1  | Group 2  | Group 3  |
| Min                                                       | 0.963388 | 0.963388 | 0.963388 |
| Q1                                                        | 11.07445 | 16.27177 | 6.501709 |
| Median                                                    | 30.33818 | 37.13759 | 6.501709 |
| Q3                                                        | 33.83835 | 54.75424 | 15.27789 |
| Max                                                       | 47.19422 | 62.87024 | 23.06602 |
| IQR                                                       | 22.7639  | 38.48247 | 8.776182 |
| <b><u>IL-1RA</u></b>                                      |          |          |          |
| Labels                                                    | Group 1  | Group 2  | Group 3  |
| Min                                                       | 11.50604 | 27.68707 | 11.50604 |
| Q1                                                        | 27.68707 | 60.46867 | 25.77264 |
| Median                                                    | 27.68707 | 99.93881 | 60.46867 |
| Q3                                                        | 72.33555 | 188.7023 | 80.82589 |
| Max                                                       | 120.6615 | 345.0315 | 140.5096 |
| IQR                                                       | 44.64849 | 128.2336 | 55.05324 |

**Table S5.** Protein identification data Gr1 v Gr2.

| Peptides | Sequence coverage [%] | Mol. weight [kDa] | Score  | Intensity   | MS/MS Count | Protein ID            |
|----------|-----------------------|-------------------|--------|-------------|-------------|-----------------------|
| 22       | 62.7                  | 36.688            | 323.31 | 69337000000 | 405         | sp P00338 LDHA_HUMAN  |
| 16       | 65.5                  | 28.87             | 323.31 | 47179000000 | 309         | sp P00915 CAH1_HUMAN  |
| 31       | 51.9                  | 75.872            | 323.31 | 40374000000 | 599         | sp P08133 ANXA6_HUMAN |
| 23       | 47.8                  | 59.256            | 323.31 | 6949100000  | 188         | sp P11413 G6PD_HUMAN  |
| 112      | 62.5                  | 280.74            | 323.31 | 1.3175E+11  | 1871        | sp P21333 FLNA_HUMAN  |
| 9        | 44.9                  | 29.555            | 244.41 | 2381800000  | 69          | sp P25786 PSA1_HUMAN  |
| 20       | 22.9                  | 140.47            | 142.5  | 3201000000  | 135         | sp P26640 SYVC_HUMAN  |
| 6        | 14.3                  | 53.425            | 96.932 | 9115400000  | 160         | sp P35637 FUS_HUMAN   |
| 7        | 48.6                  | 23.482            | 114.73 | 2576200000  | 85          | sp P51148 RAB5C_HUMAN |
| 16       | 66.9                  | 27.745            | 323.31 | 89979000000 | 439         | sp P63104 1433Z_HUMAN |
| 4        | 21.7                  | 25.476            | 131    | 3089400000  | 55          | sp Q01130 SRSF2_HUMAN |
| 66       | 35.3                  | 284.54            | 323.31 | 7183100000  | 208         | sp Q13813 SPTN1_HUMAN |
| 16       | 48.6                  | 62.293            | 212.95 | 3469300000  | 74          | sp Q16555 DPYL2_HUMAN |
| 17       | 26.6                  | 96.864            | 64.451 | 2479800000  | 88          | sp Q92598 HS105_HUMAN |
| 19       | 24.8                  | 128.3             | 113.85 | 3890900000  | 80          | sp Q93009 UBP7_HUMAN  |
| 13       | 33.8                  | 41.515            | 77.785 | 4533900000  | 133         | sp Q99873 ANM1_HUMAN  |
| 11       | 18                    | 95.737            | 59.284 | 2620300000  | 95          | sp Q9BUJ2 HNRL1_HUMAN |
| 17       | 47.5                  | 55.21             | 114.12 | 5014900000  | 86          | sp Q9Y3I0 RTCB_HUMAN  |

**Table S6.** Protein identification data Gr1 v Gr3.

| Peptides | Sequence coverage [%] | Mol. weight [kDa] | Score  | Intensity   | MS/MS Count | Protein IDs           |
|----------|-----------------------|-------------------|--------|-------------|-------------|-----------------------|
| 19       | 36.8                  | 69.602            | 323.31 | 22684000000 | 168         | sp O60506 HNRPQ_HUMAN |
| 22       | 62.7                  | 36.688            | 323.31 | 69337000000 | 405         | sp P00338 LDHA_HUMAN  |
| 17       | 65.7                  | 36.053            | 323.31 | 1.8795E+11  | 445         | sp P04406 G3P_HUMAN   |
| 25       | 51.7                  | 46.836            | 243.11 | 15064000000 | 224         | sp P05455 LA_HUMAN    |
| 7        | 37.1                  | 32.575            | 323.31 | 50920000000 | 202         | sp P06748 NPM_HUMAN   |
| 16       | 48.8                  | 36.638            | 289.23 | 74952000000 | 302         | sp P07195 LDHB_HUMAN  |
| 41       | 54.5                  | 84.659            | 323.31 | 61731000000 | 546         | sp P07900 HS90A_HUMAN |
| 16       | 37.3                  | 33.67             | 124.48 | 33462000000 | 306         | sp P07910 HNRPC_HUMAN |
| 26       | 24.7                  | 147.25            | 181.16 | 4073700000  | 202         | sp P08575 PTPRC_HUMAN |
| 37       | 67.6                  | 53.651            | 323.31 | 1.9318E+11  | 627         | sp P08670 VIME_HUMAN  |
| 12       | 43.4                  | 32.854            | 312.58 | 11163000000 | 174         | sp P08865 RSSA_HUMAN  |
| 11       | 32.4                  | 54.177            | 178.07 | 8730500000  | 119         | sp P09622 DLDH_HUMAN  |
| 18       | 45.7                  | 38.746            | 323.31 | 53786000000 | 334         | sp P09651 ROA1_HUMAN  |
| 37       | 41.7                  | 113.08            | 323.31 | 18303000000 | 466         | sp P09874 PARP1_HUMAN |
| 5        | 36.7                  | 14.728            | 56.155 | 41856000000 | 163         | sp P62987 RL40_HUMAN  |
| 3        | 22.9                  | 11.737            | 18.391 | 19812000000 | 68          | sp P10599 THIO_HUMAN  |
| 10       | 63.1                  | 31.462            | 133.24 | 7682100000  | 163         | sp P10768 ESTD_HUMAN  |
| 32       | 71.4                  | 61.054            | 323.31 | 43969000000 | 365         | sp P10809 CH60_HUMAN  |
| 28       | 53.7                  | 70.897            | 323.31 | 84040000000 | 735         | sp P11142 HSP7C_HUMAN |
| 41       | 57                    | 95.337            | 323.31 | 44415000000 | 560         | sp P13639 EF2_HUMAN   |
| 15       | 70.1                  | 28.804            | 323.31 | 54127000000 | 321         | sp P18669 PGAM1_HUMAN |
| 20       | 28.5                  | 76.613            | 323.31 | 61139000000 | 401         | sp P19338 NUCL_HUMAN  |
| 11       | 75                    | 17.298            | 88.652 | 15715000000 | 164         | sp P22392 NDKB_HUMAN  |



|    |      |        |        |             |     |                       |
|----|------|--------|--------|-------------|-----|-----------------------|
| 20 | 64   | 37.429 | 323.31 | 79031000000 | 347 | sp P22626 ROA2_HUMAN  |
| 24 | 41.9 | 76.149 | 323.31 | 23539000000 | 431 | sp P23246 SFPQ_HUMAN  |
| 13 | 63.8 | 26.688 | 166.13 | 10504000000 | 161 | sp P23396 RS3_HUMAN   |
| 15 | 71.4 | 25.035 | 274.37 | 34690000000 | 228 | sp P30041 PRDX6_HUMAN |
| 29 | 57.8 | 56.782 | 323.31 | 79293000000 | 436 | sp P30101 PDIA3_HUMAN |
| 14 | 41.2 | 49.229 | 323.31 | 23276000000 | 328 | sp P31943 HNRH1_HUMAN |
| 15 | 40.7 | 37.54  | 129.58 | 46882000000 | 301 | sp P37837 TALDO_HUMAN |
| 19 | 45.7 | 46.871 | 55.937 | 35546000000 | 85  | sp P38919 IF4A3_HUMAN |
| 9  | 29.7 | 42.592 | 33.135 | 34766000000 | 81  | sp P39748 FEN1_HUMAN  |
| 17 | 43.5 | 58.024 | 202.15 | 10635000000 | 194 | sp P40227 TCPZ_HUMAN  |
| 24 | 44.7 | 82.999 | 323.31 | 29054000000 | 299 | sp P40939 ECHA_HUMAN  |
| 14 | 50.5 | 31.35  | 276.94 | 10121000000 | 232 | sp P47756 CAPZB_HUMAN |
| 7  | 23.6 | 41.331 | 36.722 | 54819000000 | 146 | sp P50502 F10A1_HUMAN |
| 16 | 40.5 | 39.594 | 319.03 | 24148000000 | 397 | sp P51991 ROA3_HUMAN  |
| 5  | 37.8 | 14.395 | 28.622 | 95805000000 | 136 | sp P53999 TCP4_HUMAN  |
| 35 | 55.2 | 89.321 | 323.31 | 43333000000 | 514 | sp P55072 TERA_HUMAN  |
| 9  | 60.7 | 19.667 | 112.03 | 12780000000 | 133 | sp P59998 ARPC4_HUMAN |
| 22 | 74.1 | 41.736 | 323.31 | 6.5149E+11  | 908 | sp P60709 ACTB_HUMAN  |
| 7  | 50.8 | 21.768 | 151.18 | 37105000000 | 82  | sp P61586 RHOA_HUMAN  |
| 10 | 42.6 | 24.423 | 204.38 | 15360000000 | 139 | sp P62826 RAN_HUMAN   |
| 16 | 66.9 | 27.745 | 323.31 | 89979000000 | 439 | sp P63104 1433Z_HUMAN |
| 18 | 51.1 | 50.184 | 323.31 | 72420000000 | 320 | sp Q5VTE0 EF1A3_HUMAN |
| 20 | 68.1 | 50.151 | 323.31 | 79289000000 | 378 | sp P68363 TBA1B_HUMAN |
| 24 | 35.5 | 90.583 | 323.31 | 25720000000 | 318 | sp Q00839 HNRPU_HUMAN |
| 10 | 52.1 | 33.488 | 323.31 | 31816000000 | 235 | sp Q01105 SET_HUMAN   |
| 33 | 32.3 | 140.96 | 323.31 | 26562000000 | 393 | sp Q08211 DHX9_HUMAN  |
| 22 | 28   | 95.337 | 323.31 | 16457000000 | 284 | sp Q12906 ILF3_HUMAN  |
| 7  | 35.8 | 30.54  | 95.265 | 33974000000 | 57  | sp Q13162 PRDX4_HUMAN |
| 22 | 44.3 | 88.549 | 323.31 | 89390000000 | 181 | sp Q13263 TIF1B_HUMAN |
| 30 | 40.7 | 106.87 | 323.31 | 25430000000 | 487 | sp Q14697 GANAB_HUMAN |
| 18 | 42.5 | 54.231 | 228.67 | 12669000000 | 290 | sp Q15233 NONO_HUMAN  |
| 11 | 43   | 26.183 | 235.48 | 70818000000 | 123 | sp Q15631 TSN_HUMAN   |
| 14 | 41.4 | 54.529 | 107.77 | 21790000000 | 95  | sp Q16658 FSCN1_HUMAN |
| 9  | 45.4 | 31.284 | 199.35 | 71363000000 | 93  | sp Q96FW1 OTUB1_HUMAN |
| 16 | 48   | 52.878 | 137.84 | 91730000000 | 210 | sp Q96KP4 CNDP2_HUMAN |
| 17 | 47.5 | 59.366 | 198.88 | 71584000000 | 186 | sp Q99832 TCPH_HUMAN  |
| 17 | 52.3 | 56.084 | 317.26 | 77631000000 | 179 | sp Q9P258 RCC2_HUMAN  |
| 11 | 62.3 | 28.466 | 70.193 | 33472000000 | 82  | sp Q9UFN0 NPS3A_HUMAN |
| 14 | 57.6 | 37.375 | 177.48 | 60046000000 | 160 | sp Q9UJ70 NAGK_HUMAN  |
| 17 | 41.3 | 51.156 | 94.239 | 35704000000 | 117 | sp Q9Y230 RUVB2_HUMAN |
| 9  | 27.8 | 46.513 | 65.335 | 23910000000 | 98  | sp Q9Y383 LC7L2_HUMAN |

Table S7. Protein identification data Gr2 v Gr3.

| Peptides | Sequence coverage [%] | Mol. weight [kDa] | Score  | Intensity   | MS/MS Count | Protein IDs           |
|----------|-----------------------|-------------------|--------|-------------|-------------|-----------------------|
| 12       | 26.5                  | 62.942            | 90.161 | 3196100000  | 104         | sp O43776 SYNC_HUMAN  |
| 17       | 72                    | 32.118            | 323.31 | 19128000000 | 321         | sp P00491 PNPH_HUMAN  |
| 15       | 93.2                  | 16.055            | 165.4  | 46038000000 | 221         | sp P02042 HBD_HUMAN   |
| 11       | 59                    | 28.315            | 323.31 | 4009500000  | 95          | sp P04632 CPNS1_HUMAN |
| 18       | 38.6                  | 68.569            | 165.85 | 4968600000  | 145         | sp P04843 RPN1_HUMAN  |
| 22       | 67.9                  | 56.559            | 323.31 | 39134000000 | 299         | sp P06576 ATPB_HUMAN  |
| 29       | 52.9                  | 81.889            | 323.31 | 11169000000 | 289         | sp P07384 CAN1_HUMAN  |
| 10       | 63.1                  | 31.462            | 133.24 | 7682100000  | 163         | sp P10768 ESTD_HUMAN  |
| 32       | 71.4                  | 61.054            | 323.31 | 43969000000 | 365         | sp P10809 CH60_HUMAN  |
| 41       | 57                    | 95.337            | 323.31 | 44415000000 | 560         | sp P13639 EF2_HUMAN   |
| 23       | 51.3                  | 60.343            | 210.64 | 7586400000  | 162         | sp P17987 TCPA_HUMAN  |
| 34       | 49                    | 117.85            | 323.31 | 32213000000 | 430         | sp P22314 UBA1_HUMAN  |
| 20       | 64                    | 37.429            | 323.31 | 79031000000 | 347         | sp P22626 ROA2_HUMAN  |
| 22       | 49.4                  | 59.75             | 323.31 | 28886000000 | 216         | sp P25705 ATPA_HUMAN  |
| 15       | 32.9                  | 61.448            | 76.042 | 2756600000  | 126         | sp P36871 PGM1_HUMAN  |
| 12       | 75.9                  | 22.391            | 323.31 | 65127000000 | 207         | sp P37802 TAGL2_HUMAN |
| 18       | 41.5                  | 68.303            | 323.31 | 7636000000  | 207         | sp P38606 VATA_HUMAN  |
| 24       | 49.4                  | 59.67             | 280.38 | 7980300000  | 197         | sp P48643 TCPE_HUMAN  |
| 21       | 46.8                  | 60.533            | 295.06 | 10238000000 | 230         | sp P49368 TCPG_HUMAN  |
| 23       | 55.2                  | 46.153            | 285.89 | 19903000000 | 226         | sp P60842 IF4A1_HUMAN |
| 6        | 28.7                  | 42.613            | 80.538 | 2535700000  | 64          | sp P61163 ACTZ_HUMAN  |
| 11       | 56.3                  | 28.302            | 224.91 | 15341000000 | 169         | sp P61981 1433G_HUMAN |
| 20       | 63.1                  | 49.83             | 323.31 | 80137000000 | 251         | sp P68371 TBB4B_HUMAN |
| 20       | 97.3                  | 15.998            | 323.31 | 1.5707E+12  | 1266        | sp P68871 HBB_HUMAN   |
| 14       | 78.9                  | 15.257            | 323.31 | 1.068E+12   | 804         | sp P69905 HBA_HUMAN   |
| 22       | 61.1                  | 57.488            | 323.31 | 13820000000 | 238         | sp P78371 TCPB_HUMAN  |
| 15       | 59.8                  | 27.566            | 172.89 | 9665000000  | 272         | sp P78417 GSTO1_HUMAN |
| 89       | 26.8                  | 469.08            | 323.31 | 27833000000 | 502         | sp P78527 PRKDC_HUMAN |
| 6        | 42.7                  | 21.184            | 78.351 | 2164400000  | 76          | sp Q07812 BAX_HUMAN   |
| 33       | 32.3                  | 140.96            | 323.31 | 26562000000 | 393         | sp Q08211 DHX9_HUMAN  |
| 184      | 58.2                  | 629.09            | 323.31 | 1.0935E+11  | 1517        | sp Q09666 AHNK_HUMAN  |
| 7        | 45.9                  | 20.811            | 68.487 | 9713300000  | 119         | sp Q13185 CBX3_HUMAN  |
| 22       | 44.3                  | 88.549            | 323.31 | 8939000000  | 181         | sp Q13263 TIF1B_HUMAN |
| 7        | 57.8                  | 16.495            | 114.51 | 4271900000  | 111         | sp Q13404 UB2V1_HUMAN |

|    |      |        |        |             |     |                       |
|----|------|--------|--------|-------------|-----|-----------------------|
| 25 | 48.3 | 75.952 | 323.31 | 15320000000 | 300 | sp Q86UX7 URP2_HUMAN  |
| 22 | 39.3 | 82.431 | 323.31 | 9363300000  | 127 | sp Q92499 DDX1_HUMAN  |
| 18 | 37.3 | 73.114 | 243.43 | 8623300000  | 190 | sp Q92945 FUBP2_HUMAN |
| 20 | 40.5 | 67.56  | 218.79 | 5938100000  | 161 | sp Q96AE4 FUBP1_HUMAN |
| 17 | 47.5 | 59.366 | 198.88 | 7158400000  | 186 | sp Q99832 TCPH_HUMAN  |
| 16 | 49.7 | 43.786 | 74.179 | 6558800000  | 176 | sp Q9UQ80 PA2G4_HUMAN |
| 7  | 38.1 | 25.497 | 30.538 | 5833800000  | 140 | sp Q9Y2Q3 GSTK1_HUMAN |
